# Supplementary material
Source: HighWire-hosted journal article supplement (https://bmjpaedsopen.bmj.com/content/2/1/e000260)
Supplement: inline-supplementary-material-1 [file inline-supplementary-material-1.docx]

**Appendix 1**

**Survey instrument**

Anaphylaxis management: a survey of school and day care nurses in Lebanon

Dear Colleagues,

Please select the most appropriate response to the following questions

1. **Presence of guidelines for the management of anaphylaxis reaction at the school or day care**
2. The school/day care that I work at has a policy in anaphylaxis prevention by avoiding confirmed allergens (e.g. banning Peanuts)

□ Yes □ No

1. The school/day care that I work at has a written policy for managing life threatening allergies

□ Yes □ No

Please describe how you manage an anaphylactic reaction?

1. We have medical records that specify children who have an allergy

□ Yes □ No

Additional comments:

1. The school/day care has Epinephrine or Adrenaline ampoules available for intramuscular use during an emergency event

□ Yes □ No

Additional comments:

1. The school/day care has Epi-pen auto-injectors available for emergency use

□ Yes □ No

Additional comments:

1. The school/day care has written standard orders of Adrenaline (Epinephrine) injection for emergency usage

□ Yes □ No

Additional comments:

1. The staff are trained to administer Epi-pen auto-injector if available

□ Yes □ No

Additional comments:

1. School/day care awareness and training sessions are provided by healthcare providers (Physicians or Nurses) to identify and manage anaphylaxis

□ Yes □ No

Additional comments:

1. **Current practices for the management of anaphylaxis reaction of a child/student/staff** **at the school or day care**

| Question number | Questionnaires | Yes | No |
| --- | --- | --- | --- |
| 9 | I have encountered a case with an anaphylaxis reaction  If No, please proceed to question number 18 | □ | □ |
| 10 | I have administered Adrenaline (Epinephrine) IM as first treatment option for anaphylaxis | □ | □ |
| 11 | I have administered antihistamine medications IM as first treatment option | □ | □ |
| 12 | I have administered antihistamine medications orally as first treatment option | □ | □ |
| 13 | I have administered oxygen therapy | □ | □ |
| 14 | I called the ambulance to take the child/student/staff to the emergency department | □ | □ |
| 15 | I called the parents or the guardian to take the student/child/staff to the emergency department | □ | □ |
| 16 | I accompanied the student/child/staff to the emergency department | □ | □ |
| 17 | A staff member took the case to the emergency department | □ | □ |

1. **Perceptions related to the management of anaphylaxis reaction at the school or day care**

| Question number | Questionnaires | Strongly agree | Agree | Undecided | Disagree | Strongly disagree |
| --- | --- | --- | --- | --- | --- | --- |
| 18 | I believe there is a need for a standardized guideline for the management of anaphylaxis in my setting | 1  □ | 2  □ | 3  □ | 4  □ | 5  □ |
| 19 | I believe there is a need to have Adrenaline (Epinephrine) available at school/day care for emergency use with a standing order from the physician for emergency use | 1  □ | 2  □ | 3  □ | 4  □ | 5  □ |
| 20 | I would be hesitant of administering an IM Adrenaline (Epinephrine) injection | 1  □ | 2  □ | 3  □ | 4  □ | 5  □ |
| 21 | There is a need to educate nurses in proper diagnosis and management of anaphylaxis | 1  □ | 2  □ | 3  □ | 4  □ | 5  □ |

**Additional comments: ______________________________________________________________________________________________________________________________________________________________________________________________________________________________________________________________________________________________________________________________________________________________________________________________________**

1. **Demographic questions**

22. Gender? Male Female

23. What is your age?

1. 20-25
2. 26-30
3. 31-35
4. 36-40
5. 41-45
6. 46-50
7. > 50

24. The geographic area you work at is?

1. Beirut

2. Mount Lebanon

3. North

4. Akar

5. Nabatieh

6. South

7. Bekaa

8. Baalback Elhermel

25. Do you have previous clinical experience other than nursing in school/day care?

Yes No

What was your previous clinical Nursing specialty?

1. Emergency Department Nurse
2. Medical Surgical Nurse
3. Oncology Nurse
4. Pediatric Nurse
5. Critical Care Nurse
6. Primary health care Nurse
7. Other, please specify: --------------------------------------------------------------------------

26. How long did you work as a clinical Nurse other than being a Nurse at school/day care?

1. Less than 1 year
2. 1-5 years
3. 6-10 years
4. 11-15 years
5. 16-20 years
6. > 20 years

27. How long have you been working as a nurse in the school/day care?

1. Less than 1 year
2. 1-5 years
3. 6-10 years
4. 11-15 years
5. 16-20 years
6. > 20 years

28. In what kind of school/day care do you practice?

1. Public school
2. Private school
3. Public day care
4. Private day care

29. Which school levels are you responsible for? (Choose all that apply)

1. Nursery
2. Kindergarten
3. Elementary
4. Middle school
5. High school

30. How many Nurses are there at the school/day care?

1. 1
2. 2
3. More than 2

31. How many students/children are there at the school/day care

1. Less than 100

2. 101-300

3. 301-500

4. 501- 700

5. More than 700

32. What is your Nursing degree?

1. Bachelor of Science (BS)
2. Technique Superieur (TS)
3. Baccalaureate technique (BT)
4. Other, please specify: --------------------------------------------------------------------------

33. Please add any additional comments if you have:

---------------------------------------------------------------------------------------------------------------------------------------------------------------------------------------------------------------------------------------------------------------------------------------------------------------------------------------------------------------------------------------------------------------------------------------------------------------------------------------------------------------------------------------------------------------------------------------------------------

Thank you for your time in completing the survey
